# Supplementary material
Source: PubMed Central journal article supplement (PMC307673)
Supplement: pnas_100_26_15947__2.pdf [file pnas_100_26_15947__2.pdf]

**Table 3. Sequence homology between various VirB5 homologues**

|          | TraC | Bs      | pIPO2T    | pSB102     | Xf        | Avh5      | R388      | pSymA     | Lp        | pWWO      | Bh        | RP4       | VirB5C58  |
|----------|------|---------|-----------|------------|-----------|-----------|-----------|-----------|-----------|-----------|-----------|-----------|-----------|
| TraC     |      | 64 (25) | 64 (25)   | 65 (24.5)  | 65 (28.8) | 62 (21.7) | 62 (26.5) | 58 (18.4) | 53 (17.9) | 57 (20.2) | 43 (13.9) | 49 (10.2) | 47 (14.3) |
| Bs       |      |         | 80 (43.3) | 81 (41.5)  | 64 (25.5) | 65 (23.7) | 68 (26.7) | 59 (21.8) | 53 (20.6) | 58 (20.8) | 41 (10)   | 48 (10.4) | 50 (15.7) |
| pIPO2T   |      |         |           | 83 (61.48) | 64 (32.2) | 62 (26.9) | 65 (32.6) | 58 (25.2) | 56 (19.7) | 58 (23)   | 40 (15.6) | 47 (14)   | 47 (14.2) |
| pSB102   |      |         |           |            | 67 (30.1) | 63 (25)   | 65 (31)   | 60 (21.9) | 51 (16.1) | 55 (20.7) | 40 (13)   | 48 (14)   | 48 (17.4) |
| Xf       |      |         |           |            |           | 69 (26.6) | 64 (25.2) | 60 (25)   | 54 (16.8) | 64 (21.9) | 40 (14.6) | 49 (13.4) | 53 (14.4) |
| Avh5     |      |         |           |            |           |           | 64 (20.4) | 85 (74.3) | 55 (18)   | 63(17.3)  | 43 (11.3) | 46 (11)   | 51 (15.2) |
| R388     |      |         |           |            |           |           |           | 56 (17.5) | 51 (16.5) | 64 (17.8) | 42 (11.5) | 49 (15)   | 46 (18.3) |
| pSymA    |      |         |           |            |           |           |           |           | 50 (16.2) | 54 (16.3) | 46 (12.7) | 48.4 (11) | 52 (12.7) |
| Lp       |      |         |           |            |           |           |           |           |           | 58 (25.7) | 40 (12.7) | 44 (9.5)  | 50 (16.1) |
| pWWO     |      |         |           |            |           |           |           |           |           |           | 43 (12.6) | 49 (13.4) | 51 (14.5) |
| Bh       |      |         |           |            |           |           |           |           |           |           |           | 40 (8.8)  | 39 (13)   |
| RP4      |      |         |           |            |           |           |           |           |           |           |           |           | 49 (12)   |
| VirB5C58 |      |         |           |            |           |           |           |           |           |           |           |           |           |

|        | TraC | Bs      | pIPO2T    | pSB102     | Xf        | Avh5      | R388      | pSymA     | Lp        | pWWO      | Bh        | RP4       | VirB5C58  |
|--------|------|---------|-----------|------------|-----------|-----------|-----------|-----------|-----------|-----------|-----------|-----------|-----------|
| TraC   |      | 64 (25) | 64 (25)   | 65 (24.5)  | 65 (28.8) | 62 (21.7) | 62 (26.5) | 58 (18.4) | 53 (17.9) | 57 (20.2) | 43 (13.9) | 49 (10.2) | 47 (14.3) |
| Bs     |      |         | 80 (43.3) | 81 (41.5)  | 64 (25.5) | 65 (23.7) | 68 (26.7) | 59 (21.8) | 53 (20.6) | 58 (20.8) | 41 (10)   | 48 (10.4) | 50 (15.7) |
| pIPO2T |      |         |           | 83 (61.48) | 64 (32.2) | 62 (26.9) | 65 (32.6) | 58 (25.2) | 56 (19.7) | 58 (23)   | 40 (15.6) | 47 (14)   | 47 (14.2) |
| pSB102 |      |         |           |            | 67 (30.1) | 63 (25)   | 65 (31)   | 60 (21.9) | 51 (16.1) | 55 (20.7) | 40 (13)   | 48 (14)   | 48 (17.4) |
| Xf     |      |         |           |            |           | 69 (26.6) | 64 (25.2) | 60 (25)   | 54 (16.8) | 64 (21.9) | 40 (14.6) | 49 (13.4) | 53 (14.4) |
| Avh5   |      |         |           |            |           |           | 64 (20.4) | 85 (74.3) | 55 (18)   | 63(17.3)  | 43 (11.3) | 46 (11)   | 51 (15.2) |
| R388   |      |         |           |            |           |           |           | 56 (17.5) | 51 (16.5) | 64 (17.8) | 42 (11.5) | 49 (15)   | 46 (18.3) |
| pSymA  |      |         |           |            |           |           |           |           | 50 (16.2) | 54 (16.3) | 46 (12.7) | 48.4 (11) | 52 (12.7) |
| Lp     |      |         |           |            |           |           |           |           |           | 58 (25.7) | 40 (12.7) | 44 (9.5)  | 50 (16.1) |

|          | TraC | Bs | pIPO2T | pSB102 | Xf | Avh5 | R388 | pSymA | Lp | pWWO | Bh        | RP4       | VirB5C58  |
|----------|------|----|--------|--------|----|------|------|-------|----|------|-----------|-----------|-----------|
| pWWO     |      |    |        |        |    |      |      |       |    |      | 43 (12.6) | 49 (13.4) | 51 (14.5) |
| Bh       |      |    |        |        |    |      |      |       |    |      |           | 40 (8.8)  | 39 (13)   |
| RP4      |      |    |        |        |    |      |      |       |    |      |           |           | 49 (12)   |
| VirB5C58 |      |    |        |        |    |      |      |       |    |      |           |           |           |

The following VirB5 protein sequences were used in the alignment: TraC from plasmid pKM101 (GenBank accession no. AAF40212), VirB5 from *Brucella suis* (Bs) (GenBank accession no. AAD56615), TraF from plasmid pIPO2T (GenBank accession no. NP\_444522), TraF from plasmid pSB102 (GenBank accession no. NP\_361047), conjugal transfer protein from *Xylella fastidiosa* (Xf) (GenBank accession no. NP\_061664), Avh5 from *Agrobacterium tumefaciens* plasmid pAtC58 (GenBank accession no. AAL04063), TrwJ from plasmid R388 (GenBank accession no. CAA57025), VirB5 *Sinorhizobium meliloti* plasmid pSymA (GenBank accession no. NP\_435961), lvhB5 from *Legionella pneumophila* (GenBank accession no. CAB60054), MpfD from *Pseudomonas putida* plasmid pWW0 (GenBank accession no. NP\_542927). 17-kDa antigen from *Bartonella henselae* (GenBank accession no. AAC17453), TrbF from plasmid RP4 (GenBank accession no. AAA26432), and VirB5 from *A. tumefaciens* strain C58 (GenBank accession no. AAL46407).
